# Supplementary material for: Multiple mutations in the para-sodium channel gene are associated with pyrethroid resistance in Rhipicephalus microplus from the United States and Mexico
Source: PubMed Central journal article supplement (PMC4189684; doi:10.1186/s13071-014-0456-z), 2014-10-01
Supplement: 13071_2014_456_MOESM1_ESM.pdf [file 13071_2014_456_MOESM1_ESM.pdf]

**Additional file 1: Table S1. Sampling information, genotype frequencies, and larval packet discriminating dose (DD) survival for cattle fever ticks sampled in Texas and Mexico.** A total of 1488 *Rhipicephalus microplus* from 77 field collections were sampled from 60 properties; a single collection is defined as a sample of ticks from one property taken within a 30-day time window. Tick samples collected from the same property but separated by >30 days are treated as distinct collections. The host column includes domestic cattle from Texas or Mexico (cow), feral Mexican cattle that were captured on the Texas side of the U.S.-Mexico border (cow<sup>MX</sup>), and white-tailed deer (WTD). Bold font is used to highlight the frequency of resistance SNPs and the percentage of survival in larval packet DD assays (Rm01-Rm63 DD data from Busch et al. [1]). We included permethrin-resistant laboratory tick strains as control populations. A total of 434 *Rhipicephalus annulatus* from 26 collections were sampled from 18 properties as described above. Hosts for *R. annulatus* include the same as *R. microplus* (cattle and WTD) plus exotic red deer (ERD), domestic U.S. horses (horse), and stray Mexican horses captured on the Texas side of the U.S-Mexico border (horse<sup>MX</sup>). The three resistance loci within the *para*-sodium channel gene are named according to nucleotide position, following the convention of previous studies (see details in footnotes).

| Collections                | Property | Collection Date           | n  | Host              | County/<br>State | C190A <sup>a</sup> |    |    | T170C <sup>b</sup> |    |    | T2134A <sup>c</sup> |    |    | Freq w/2<br>R SNPs | % Survival in DD LPT <sup>d</sup> |                     |     |
|----------------------------|----------|---------------------------|----|-------------------|------------------|--------------------|----|----|--------------------|----|----|---------------------|----|----|--------------------|-----------------------------------|---------------------|-----|
|                            |          |                           |    |                   |                  | SS                 | RS | RR | SS                 | RS | RR | SS                  | RS | RR |                    | 0.125% <sup>e</sup>               | 0.250% <sup>e</sup> |     |
| <b>U.S. Field</b>          |          |                           |    |                   |                  |                    |    |    |                    |    |    |                     |    |    |                    |                                   |                     |     |
| <b><i>R. microplus</i></b> |          |                           |    |                   |                  |                    |    |    |                    |    |    |                     |    |    |                    |                                   |                     |     |
| Rm01                       | RmProp01 | 3/10/2008                 | 6  | cow <sup>MX</sup> | Webb             | 1                  | 0  | 0  | 1                  | 0  | 0  | 1                   | 0  | 0  | 0                  | 0                                 | 0                   | 0   |
| Rm02                       | RmProp02 | 10/9/2009                 | 17 | cow               | Webb             | 1                  | 0  | 0  | 1                  | 0  | 0  | 1                   | 0  | 0  | 0                  | 0                                 | 0                   | 0   |
| Rm03                       | RmProp03 | 1/2/2008                  | 6  | cow               | Webb             | 1                  | 0  | 0  | 1                  | 0  | 0  | 1                   | 0  | 0  | 0                  | 0                                 | 0                   | 0   |
| Rm04                       | RmProp04 | 12/2/2009                 | 6  | cow               | Webb             | 1                  | 0  | 0  | 1                  | 0  | 0  | 1                   | 0  | 0  | 0                  | 0                                 | 0                   | 0   |
| Rm05                       | RmProp05 | 6/19/2008                 | 30 | cow               | Zapata           | 1                  | 0  | 0  | 1                  | 0  | 0  | 1                   | 0  | 0  | 0                  | 0                                 | 0                   | 0   |
| Rm06                       | RmProp06 | 12/17/2009,<br>01/07/2010 | 29 | WTD               | Zapata           | 1                  | 0  | 0  | 1                  | 0  | 0  | 1                   | 0  | 0  | 0                  | 0                                 | 0                   | 0   |
| Rm07                       | RmProp07 | 1/21/2010                 | 7  | WTD               | Zapata           | 1                  | 0  | 0  | 1                  | 0  | 0  | 1                   | 0  | 0  | 0                  | 0                                 | 0                   | 0   |
| Rm08                       | RmProp08 | 12/9/2009                 | 10 | WTD               | Zapata           | 1                  | 0  | 0  | 1                  | 0  | 0  | 1                   | 0  | 0  | 0                  | 0                                 | 0                   | 0   |
| Rm09                       | RmProp09 | 11/14/2007                | 14 | cow               | Zapata           | 1                  | 0  | 0  | 1                  | 0  | 0  | 1                   | 0  | 0  | 0                  | 0                                 | 0                   | 0   |
| Rm10                       | RmProp10 | 5/6/2009,<br>06/04/2009   | 31 | cow               | Zapata           | 1                  | 0  | 0  | 1                  | 0  | 0  | 1                   | 0  | 0  | 0                  | 0                                 | 0                   | 0   |
| Rm11                       | RmProp10 | 9/28/2009                 | 11 | cow               | Zapata           | 1                  | 0  | 0  | 1                  | 0  | 0  | 1                   | 0  | 0  | 0                  | 0                                 | 0                   | 0   |
| Rm12                       | RmProp11 | 6/20/2007                 | 27 | cow               | Zapata           | 1                  | 0  | 0  | 1                  | 0  | 0  | 1                   | 0  | 0  | 0                  | 0                                 | 0                   | 0   |
| Rm13                       | RmProp11 | 7/27/2009                 | 20 | cow               | Zapata           | 1                  | 0  | 0  | 1                  | 0  | 0  | 1                   | 0  | 0  | 0                  | 0                                 | 0                   | 0   |
| Rm14                       | RmProp11 | 11/16/2009                | 13 | WTD               | Zapata           | 1                  | 0  | 0  | 1                  | 0  | 0  | 1                   | 0  | 0  | 0                  | 0                                 | 0                   | 0   |
| Rm15                       | RmProp12 | 12/4/2008                 | 12 | WTD               | Zapata           | 1                  | 0  | 0  | 1                  | 0  | 0  | 1                   | 0  | 0  | 0                  | 0                                 | 0                   | 0   |
| Rm16                       | RmProp13 | 12/28/2009,<br>01/13/2010 | 20 | WTD               | Zapata           | 1                  | 0  | 0  | 1                  | 0  | 0  | 1                   | 0  | 0  | 0                  | 0                                 | 0                   | 0   |
| Rm17                       | RmProp14 | 7/16/2009                 | 20 | cow               | Zapata           | 1                  | 0  | 0  | 1                  | 0  | 0  | 1                   | 0  | 0  | 0                  | 0                                 | 0                   | 0   |
| Rm18                       | RmProp15 | 5/19/2009                 | 6  | cow               | Zapata           | 1                  | 0  | 0  | 1                  | 0  | 0  | 1                   | 0  | 0  | 0                  | 0                                 | 0                   | 0   |
| Rm19                       | RmProp16 | 5/6/2009                  | 2  | cow               | Zapata           | 1                  | 0  | 0  | 1                  | 0  | 0  | 1                   | 0  | 0  | 0                  | N/A                               | N/A                 | N/A |

|      |          |                                                        |                    |                   |        |       |       |       |       |       |       |       |       |   |       |            |            |
|------|----------|--------------------------------------------------------|--------------------|-------------------|--------|-------|-------|-------|-------|-------|-------|-------|-------|---|-------|------------|------------|
| Rm20 | RmProp17 | 5/7/2008                                               | 2                  | WTD               | Zapata | 0     | 0     | 1     | 1     | 0     | 0     | 1     | 0     | 0 | 1     | N/A        | N/A        |
| Rm21 | RmProp18 | 6/26/2008                                              | 4                  | cow               | Zapata | 0     | 0     | 1     | 1     | 0     | 0     | 1     | 0     | 0 | 1     | 100        | 100        |
| Rm22 | RmProp19 | 5/6/2009                                               | 2 <sup>HWE</sup>   | cow               | Zapata | 0.5   | 0.5   | 0     | 0     | 1     | 0     | 1     | 0     | 0 | 0.5   | N/A        | N/A        |
| Rm23 | RmProp20 | 5/6/2009                                               | 7 <sup>HWE</sup>   | cow               | Zapata | 0.571 | 0.286 | 0.143 | 0.714 | 0.286 | 0     | 1     | 0     | 0 | 0.143 | N/A        | N/A        |
| Rm24 | RmProp21 | 6/25/2009                                              | 1                  | cow               | Zapata | 0     | 0     | 1     | 1     | 0     | 0     | 1     | 0     | 0 | 1     | N/A        | N/A        |
| Rm25 | RmProp22 | 05/4/2009,<br>05/15/2009                               | 6 <sup>HWE</sup>   | cow               | Zapata | 0     | 0.333 | 0.667 | 1     | 0     | 0     | 1     | 0     | 0 | 0.667 | N/A        | N/A        |
| Rm26 | RmProp23 | 11/5/2008                                              | 19 <sup>HWE</sup>  | cow               | Zapata | 0.105 | 0.632 | 0.263 | 0.632 | 0.316 | 0.053 | 1     | 0     | 0 | 0.579 | 62.6       | 61.1       |
| Rm27 | RmProp24 | 10/27/2008,<br>11/05/2008                              | 24 <sup>HWE</sup>  | cow               | Zapata | 0.167 | 0.292 | 0.542 | 0.708 | 0.25  | 0.042 | 1     | 0     | 0 | 0.708 | 73.6, 62.1 | 77.5, 64.7 |
| Rm28 | RmProp25 | 4/15/2009,<br>4/24/2009,<br>05/06/2009                 | 36 <sup>HWE</sup>  | cow               | Zapata | 0.194 | 0.44  | 0.361 | 0.667 | 0.306 | 0.028 | 1     | 0     | 0 | 0.556 | 0          | 0          |
| Rm29 | RmProp26 | 4/15/2009,<br>04/24/2009,<br>05/01/2009,<br>05/15/2009 | 25 <sup>HWE</sup>  | cow               | Zapata | 0.12  | 0.52  | 0.36  | 0.68  | 0.32  | 0     | 1     | 0     | 0 | 0.56  | 45.2       | 16.6       |
| Rm30 | RmProp27 | 4/20/2009,<br>04/24/2009,<br>05/01/2009                | 60 <sup>HWE</sup>  | cow               | Zapata | 0.217 | 0.433 | 0.35  | 0.617 | 0.367 | 0.016 | 1     | 0     | 0 | 0.633 | 92.8       | 70.7       |
| Rm31 | RmProp27 | 7/16/2009                                              | 12 <sup>HWE</sup>  | cow               | Zapata | 0.25  | 0.25  | 0.5   | 0.667 | 0.25  | 0.083 | 1     | 0     | 0 | 0.667 | N/A        | N/A        |
| Rm32 | RmProp28 | 6/26/2008                                              | 18 <sup>HWE</sup>  | cow               | Zapata | 0.111 | 0.389 | 0.5   | 0.611 | 0.389 | 0     | 1     | 0     | 0 | 0.833 | 65.3       | 77.2       |
| Rm33 | RmProp29 | 11/15/2007                                             | 7                  | cow <sup>MX</sup> | Starr  | 1     | 0     | 0     | 1     | 0     | 0     | 1     | 0     | 0 | 0     | 0          | 0          |
| Rm34 | RmProp30 | 4/29/2005,<br>05/03/2005                               | 42 <sup>HWE</sup>  | cow               | Starr  | 1     | 0     | 0     | 0.976 | 0.024 | 0     | 1     | 0     | 0 | 0     | 0.5        | 0          |
| Rm35 | RmProp31 | 6/6/2008                                               | 22                 | cow               | Starr  | 1     | 0     | 0     | 1     | 0     | 0     | 1     | 0     | 0 | 0     | N/A        | N/A        |
| Rm36 | RmProp32 | 12/30/2008                                             | 31 <sup>HWE</sup>  | WTD               | Starr  | 1     | 0     | 0     | 1     | 0     | 0     | 0.935 | 0.065 | 0 | 0     | N/A        | N/A        |
| Rm37 | RmProp33 | 3/27/2008                                              | 15                 | cow               | Starr  | 1     | 0     | 0     | 1     | 0     | 0     | 1     | 0     | 0 | 0     | N/A        | N/A        |
| Rm38 | RmProp34 | 5/23/2008                                              | 24                 | cow               | Starr  | 1     | 0     | 0     | 1     | 0     | 0     | 1     | 0     | 0 | 0     | N/A        | N/A        |
| Rm39 | RmProp34 | 3/18/2009                                              | 18                 | cow               | Starr  | 1     | 0     | 0     | 1     | 0     | 0     | 1     | 0     | 0 | 0     | N/A        | N/A        |
| Rm40 | RmProp34 | 4/9/2009,<br>04/24/2009                                | 14                 | cow               | Starr  | 1     | 0     | 0     | 1     | 0     | 0     | 1     | 0     | 0 | 0     | N/A        | N/A        |
| Rm41 | RmProp35 | 6/4/2008                                               | 13                 | WTD               | Starr  | 1     | 0     | 0     | 1     | 0     | 0     | 1     | 0     | 0 | 0     | N/A        | N/A        |
| Rm42 | RmProp36 | 2/22/2008                                              | 30                 | cow               | Starr  | 1     | 0     | 0     | 1     | 0     | 0     | 1     | 0     | 0 | 0     | 0          | 0          |
| Rm43 | RmProp37 | 4/11/2008                                              | 48                 | cow               | Starr  | 1     | 0     | 0     | 1     | 0     | 0     | 1     | 0     | 0 | 0     | N/A        | N/A        |
| Rm44 | RmProp38 | 5/19/2009                                              | 16                 | cow               | Starr  | 1     | 0     | 0     | 1     | 0     | 0     | 1     | 0     | 0 | 0     | 0          | 0          |
| Rm45 | RmProp38 | 7/27/2009                                              | 7                  | cow               | Starr  | 1     | 0     | 0     | 1     | 0     | 0     | 1     | 0     | 0 | 0     | 0          | 0          |
| Rm46 | RmProp39 | 2/17/2009                                              | 30                 | cow               | Starr  | 1     | 0     | 0     | 1     | 0     | 0     | 1     | 0     | 0 | 0     | 0          | 0          |
| Rm47 | RmProp39 | 3/3/2009                                               | 171                | WTD               | Starr  | 1     | 0     | 0     | 1     | 0     | 0     | 1     | 0     | 0 | 0     | N/A        | N/A        |
| Rm48 | RmProp39 | 3/4/2009                                               | 22                 | cow               | Starr  | 1     | 0     | 0     | 1     | 0     | 0     | 1     | 0     | 0 | 0     | N/A        | N/A        |
| Rm49 | RmProp40 | 4/2/2009                                               | 29                 | cow               | Starr  | 1     | 0     | 0     | 1     | 0     | 0     | 1     | 0     | 0 | 0     | 0          | 0          |
| Rm50 | RmProp41 | 6/19/2008                                              | 56 <sup>HWE*</sup> | cow               | Starr  | 0.982 | 0     | 0.018 | 1     | 0     | 0     | 1     | 0     | 0 | 0.018 | 0.8        | 1.5        |
| Rm51 | RmProp42 | 1/16/2009                                              | 30                 | cow               | Starr  | 1     | 0     | 0     | 1     | 0     | 0     | 1     | 0     | 0 | 0     | 0          | 0          |
| Rm52 | RmProp42 | 2/27/2009                                              | 30                 | cow               | Starr  | 1     | 0     | 0     | 1     | 0     | 0     | 1     | 0     | 0 | 0     | 0          | 0          |
| Rm53 | RmProp42 | 3/27/2009                                              | 11                 | cow               | Starr  | 1     | 0     | 0     | 1     | 0     | 0     | 1     | 0     | 0 | 0     | N/A        | N/A        |
| Rm54 | RmProp42 | 4/10/2009                                              | 10                 | cow               | Starr  | 1     | 0     | 0     | 1     | 0     | 0     | 1     | 0     | 0 | 0     | N/A        | N/A        |
| Rm55 | RmProp42 | 5/4/2009                                               | 3                  | cow               | Starr  | 1     | 0     | 0     | 1     | 0     | 0     | 1     | 0     | 0 | 0     | N/A        | N/A        |
| Rm56 | RmProp42 | 7/8/2009                                               | 20                 | cow               | Starr  | 1     | 0     | 0     | 1     | 0     | 0     | 1     | 0     | 0 | 0     | N/A        | N/A        |
| Rm57 | RmProp42 | 8/13/2009                                              | 2                  | cow               | Starr  | 1     | 0     | 0     | 1     | 0     | 0     | 1     | 0     | 0 | 0     | N/A        | N/A        |
| Rm58 | RmProp43 | 5/4/2009                                               | 18                 | cow               | Starr  | 1     | 0     | 0     | 1     | 0     | 0     | 1     | 0     | 0 | 0     | N/A        | N/A        |
| Rm59 | RmProp44 | 4/15/2009                                              | 30                 | cow               | Starr  | 1     | 0     | 0     | 1     | 0     | 0     | 1     | 0     | 0 | 0     | 0          | 0          |
| Rm60 | RmProp45 | 5/6/2009                                               | 15                 | cow               | Starr  | 1     | 0     | 0     | 1     | 0     | 0     | 1     | 0     | 0 | 0     | N/A        | N/A        |
| Rm61 | RmProp45 | 6/8/2009,<br>06/29/2009                                | 3                  | cow               | Starr  | 1     | 0     | 0     | 1     | 0     | 0     | 1     | 0     | 0 | 0     | N/A        | N/A        |

|                                  |             |                                       |                   |                   |                    |       |       |       |       |       |   |       |       |       |       |      |      |
|----------------------------------|-------------|---------------------------------------|-------------------|-------------------|--------------------|-------|-------|-------|-------|-------|---|-------|-------|-------|-------|------|------|
| Rm62                             | RmProp45    | 7/31/2009                             | 1                 | cow               | Starr              | 1     | 0     | 0     | 1     | 0     | 0 | 1     | 0     | 0     | 0     | N/A  | N/A  |
| Rm63                             | RmProp46    | 5/5/2008                              | 3                 | cow               | Hidalgo            | 1     | 0     | 0     | 1     | 0     | 0 | 1     | 0     | 0     | 0     | N/A  | N/A  |
| Rm64 <sup>S</sup>                | RmProp47    | 9/17/2010,<br>9/24/2010,<br>10/1/2010 | 4 <sup>HWE*</sup> | cow               | Hidalgo            | 0     | 1     | 0     | 1     | 0     | 0 | 1     | 0     | 0     | 0     | 34.1 | 16.5 |
| Rm65 <sup>S</sup>                | RmProp48    | 11/8/2011                             | 29 <sup>HWE</sup> | cow <sup>MX</sup> | Cameron            | 0.621 | 0.345 | 0.034 | 1     | 0     | 0 | 0.821 | 0.179 | 0     | 0.103 | 44   | 19.1 |
| Rm66 <sup>S</sup>                | RmProp49    | 6/11/2010,<br>7/23/2010,<br>7/30/2010 | 26 <sup>HWE</sup> | cow               | Starr              | 0.231 | 0.423 | 0.346 | 1     | 0     | 0 | 1     | 0     | 0     | 0.346 | 14.4 | 4.8  |
| Rm67 <sup>S</sup>                | RmProp50    | 1/5/2011                              | 23 <sup>HWE</sup> | cow               | Starr              | 0.087 | 0.435 | 0.478 | 1     | 0     | 0 | 0.826 | 0.174 | 0     | 0.652 | 86.1 | 76.3 |
| Rm68 <sup>S</sup><br>(NVSL_T620) | RmProp51    | 6/16/2010                             | 1                 | cow               | Webb               | 0     | 1     | 0     | 1     | 0     | 0 | 1     | 0     | 0     | 0     | N/A  | N/A  |
| <b>Mexico Field</b>              |             |                                       |                   |                   |                    |       |       |       |       |       |   |       |       |       |       |      |      |
| Rm69 <sup>S</sup>                | RmProp52    | 2012                                  | 1                 | cow               | Colima             | 1     | 0     | 0     | 1     | 0     | 0 | 1     | 0     | 0     | 0     | N/A  | N/A  |
| Rm70 <sup>S</sup>                | RmProp53    | 2012                                  | 1                 | cow               | Chiapas            | 1     | 0     | 0     | 1     | 0     | 0 | 0     | 1     | 0     | 0     | N/A  | N/A  |
| Rm71 <sup>S</sup>                | RmProp54    | 2012                                  | 2                 | cow               | Chiapas            | 1     | 0     | 0     | 1     | 0     | 0 | 0     | 0     | 1     | 1     | N/A  | N/A  |
| Rm72 <sup>S</sup>                | RmProp55    | 2012                                  | 2                 | cow               | Colima             | 1     | 0     | 0     | 1     | 0     | 0 | 1     | 0     | 0     | 0     | N/A  | N/A  |
| Rm73 <sup>S</sup>                | RmProp56    | 2012                                  | 2                 | cow               | Colima             | 1     | 0     | 0     | 1     | 0     | 0 | 1     | 0     | 0     | 0     | N/A  | N/A  |
| Rm74 <sup>S</sup>                | RmProp57    | 2012                                  | 2 <sup>HWE</sup>  | cow               | Colima             | 0.5   | 0.5   | 0     | 1     | 0     | 0 | 0.5   | 0.5   | 0     | 0     | N/A  | N/A  |
| Rm75 <sup>S</sup>                | RmProp58    | 2012                                  | 7 <sup>HWE</sup>  | cow               | Hidalgo            | 0.571 | 0.286 | 0.143 | 0.714 | 0.286 | 0 | 0.143 | 0.571 | 0.286 | 1     | N/A  | N/A  |
| Rm76 <sup>S</sup>                | RmProp59    | 2012                                  | 7 <sup>HWE</sup>  | cow               | Veracruz           | 0.571 | 0.429 | 0     | 0.857 | 0.143 | 0 | 0.143 | 0.571 | 0.286 | 0.714 | N/A  | N/A  |
| Rm77 <sup>S</sup>                | RmProp60    | 2012                                  | 7 <sup>HWE*</sup> | cow               | San Luis<br>Potosi | 0.429 | 0     | 0.143 | 1     | 0     | 0 | 0.857 | 0.143 | 0     | 0.143 | N/A  | N/A  |
| <b>Laboratory Strains</b>        |             |                                       |                   |                   |                    |       |       |       |       |       |   |       |       |       |       |      |      |
| B&H Ranch                        | B&H Ranch   | 8/3/2004<br>(F6)                      | 10                | cow               | Hidalgo            | 1     | 0     | 0     | 1     | 0     | 0 | 0     | 0     | 1     | 1     | N/A  | N/A  |
| Corrales                         | Corrales    | 7/8/1996<br>(F4)                      | 30                | cow               | Colima             | 1     | 0     | 0     | 1     | 0     | 0 | 0     | 0     | 1     | 1     | 100  | 100  |
| San Felipe                       | San Felipe  | 10/26/2004<br>(F44)                   | 30 <sup>HWE</sup> | cow               | Tamaulipas         | 0.867 | 0.133 | 0     | 1     | 0     | 0 | 0.067 | 0.367 | 0.567 | 0.7   | N/A  | N/A  |
| Santa Luiza                      | Santa Luiza | 3/22/2005<br>(F20)                    | 30                | cow               | Brazil             | 0     | 0     | 1     | 1     | 0     | 0 | 1     | 0     | 0     | 1     | N/A  | N/A  |
| <b>U.S. Field R. annulatus</b>   |             |                                       |                   |                   |                    |       |       |       |       |       |   |       |       |       |       |      |      |
| Ra01                             | RaProp01    | 6/12/2008                             | 1                 | cow               | Val Verde          | 1     | 0     | 0     | 1     | 0     | 0 | 1     | 0     | 0     | 0     | N/A  | N/A  |
| Ra02                             | RaProp02    | 3/3/2006                              | 23                | cow <sup>MX</sup> | Kinney             | 1     | 0     | 0     | 1     | 0     | 0 | 1     | 0     | 0     | 0     | 0    | 0    |
| Ra03                             | RaProp03    | 3/9/2005                              | 16                | cow               | Kinney             | 1     | 0     | 0     | 1     | 0     | 0 | 1     | 0     | 0     | 0     | 4.5  | 0    |
| Ra04                             | RaProp03    | 12/4/2007                             | 28                | cow               | Kinney             | 1     | 0     | 0     | 1     | 0     | 0 | 1     | 0     | 0     | 0     | 0    | 0    |
| Ra05                             | RaProp04    | 12/28/2007                            | 3                 | ERD               | Maverick           | 1     | 0     | 0     | 1     | 0     | 0 | 1     | 0     | 0     | 0     | N/A  | N/A  |
| Ra06                             | RaProp04    | 7/15/2008                             | 24                | ERD               | Maverick           | 1     | 0     | 0     | 1     | 0     | 0 | 1     | 0     | 0     | 0     | N/A  | N/A  |
| Ra07                             | RaProp04    | 6/16/2009                             | 6                 | ERD               | Maverick           | 1     | 0     | 0     | 1     | 0     | 0 | 1     | 0     | 0     | 0     | 0    | 0    |
| Ra08                             | RaProp04    | 10/30/2009                            | 31                | ERD               | Maverick           | 1     | 0     | 0     | 1     | 0     | 0 | 1     | 0     | 0     | 0     | 0    | 0    |
| Ra09                             | RaProp04    | 5/24/2010                             | 36                | ERD               | Maverick           | 1     | 0     | 0     | 1     | 0     | 0 | 1     | 0     | 0     | 0     | 0    | 0    |
| Ra10                             | RaProp05    | 3/23/2007                             | 17                | cow <sup>MX</sup> | Maverick           | 1     | 0     | 0     | 1     | 0     | 0 | 1     | 0     | 0     | 0     | 0    | 0    |
| Ra11                             | RaProp06    | 12/7/2006                             | 11                | cow               | Maverick           | 1     | 0     | 0     | 1     | 0     | 0 | 1     | 0     | 0     | 0     | 0    | 0    |
| Ra12                             | RaProp07    | 6/15/2007                             | 10                | cow               | Maverick           | 1     | 0     | 0     | 1     | 0     | 0 | 1     | 0     | 0     | 0     | 0    | 0    |
| Ra13                             | RaProp08    | 2/26/2010                             | 8                 | horse             | Maverick           | 1     | 0     | 0     | 1     | 0     | 0 | 1     | 0     | 0     | 0     | N/A  | N/A  |
| Ra14                             | RaProp09    | 9/26/2008                             | 19                | cow               | Maverick           | 1     | 0     | 0     | 1     | 0     | 0 | 1     | 0     | 0     | 0     | N/A  | N/A  |
| Ra15                             | RaProp10    | 3/14/2008                             | 21                | cow               | Maverick           | 1     | 0     | 0     | 1     | 0     | 0 | 1     | 0     | 0     | 0     | 0    | 0    |

|      |          |                        |    |                     |          |   |   |   |   |   |   |   |   |   |   |     |     |
|------|----------|------------------------|----|---------------------|----------|---|---|---|---|---|---|---|---|---|---|-----|-----|
| Ra16 | RaProp11 | 11/13/2007             | 8  | cow                 | Dimmit   | 1 | 0 | 0 | 1 | 0 | 0 | 1 | 0 | 0 | 0 | 0   | 0   |
| Ra17 | RaProp11 | 6/2/2008,<br>6/27/2008 | 41 | cow                 | Dimmit   | 1 | 0 | 0 | 1 | 0 | 0 | 1 | 0 | 0 | 0 | 0   | 0   |
| Ra18 | RaProp12 | 11/6/2007              | 30 | cow                 | Dimmit   | 1 | 0 | 0 | 1 | 0 | 0 | 1 | 0 | 0 | 0 | 0   | 0   |
| Ra19 | RaProp13 | 8/7/2007               | 2  | cow                 | Dimmit   | 1 | 0 | 0 | 1 | 0 | 0 | 1 | 0 | 0 | 0 | 0   | 0   |
| Ra20 | RaProp14 | 11/16/2007             | 30 | cow                 | Webb     | 1 | 0 | 0 | 1 | 0 | 0 | 1 | 0 | 0 | 0 | 0   | 0   |
| Ra21 | RaProp14 | 11/30/2007             | 13 | WTD                 | Webb     | 1 | 0 | 0 | 1 | 0 | 0 | 1 | 0 | 0 | 0 | N/A | N/A |
| Ra22 | RaProp15 | 3/7/2008               | 29 | cow                 | Webb     | 1 | 0 | 0 | 1 | 0 | 0 | 1 | 0 | 0 | 0 | N/A | N/A |
| Ra23 | RaProp16 | 5/6/2008               | 21 | cow                 | Webb     | 1 | 0 | 0 | 1 | 0 | 0 | 1 | 0 | 0 | 0 | 0   | 0   |
| Ra24 | RaProp17 | 6/4/2009               | 2  | cow                 | Webb     | 1 | 0 | 0 | 1 | 0 | 0 | 1 | 0 | 0 | 0 | N/A | N/A |
| Ra25 | RaProp18 | 11/30/2007             | 3  | cow                 | Webb     | 1 | 0 | 0 | 1 | 0 | 0 | 1 | 0 | 0 | 0 | N/A | N/A |
| Ra26 | RaProp19 | 5/4/2005               | 1  | horse <sup>MX</sup> | Maverick | 1 | 0 | 0 | 1 | 0 | 0 | 1 | 0 | 0 | 0 | N/A | N/A |

<sup>a</sup>C190A, Morgan et al. 2009; <sup>b</sup>T170C, Williamson et al. 1996; <sup>c</sup>T2134A, He et al. 1999; <sup>d</sup>FAO 1971.

<sup>e</sup>The USDA tests two levels of permethrin active ingredient (AI): 0.125% and 0.250%

<sup>S</sup>Collections added to the STRUCTURE population assignment analysis of 63 *R. microplus* collections described previously [1].

<sup>HWE</sup>Collections found to be in Hardy-Weinberg equilibrium (collections that were monomorphic and/or had a sample size of one were not tested).

<sup>HWE\*</sup>Collections out of Hardy-Weinberg equilibrium.

1. Busch JD, Stone NE, Nottingham R, Araya-Anchetta A, Lewis J, Hochhalter C, Giles JR, Gruendike J, Freeman J, Buckmeier G *et al*: **Widespread movement of invasive cattle fever ticks (*Rhipicephalus microplus*) in southern Texas leads to shared local infestations on cattle and deer.** *Parasit Vectors* 2014, **7**(188):188.
